# Supplementary material
Source: PubMed Central journal article supplement (PMC6866198)
Supplement: MCN-14-e12465-s001.pdf [file MCN-14-e12465-s001.pdf]

## Knowledge of Obstetric Hemorrhage

**Instructions:** Using an X, mark the option that best answers the question.

**1. Postpartum hemorrhage is defined as the loss of how much blood after a vaginal birth?**

- a. More than 300 ml
- b. More than 500 ml
- c. More than 750 ml
- d. More than 1000 ml

**2. When uterine atony is present, what are the best first actions to take?**

- a. Ask for help, start an IV, administer syntocinon or other uterotonic
- b. Administer syntocinon, administer misoprostol, administer ergovina
- c. Ask for help, prepare for hysterectomy, start an IV
- d. Uterine masage, begin lactation, and manual revision of the uterus

**3. Indicate whether the following statement is true or false: Active Management of the Third Stage of Labor reduces the risk of Postpartum Hemorrhage.**

- a. True
- b. False

**4. What is the most common cause of postpartum hemorrhage?**

- a. Atony
- b. Vaginal Laceration
- c. Coagulation disorder
- d. Retained placenta/placental fragments

**5. Indicate whether the following statement is true or false: Increase in pulse is a sign or symptom of hypovolemic shock.**

- a. True
- b. False

**6. How much crystalloid solution (isotonic fluid) should be replaced after losing 1 liter of blood?**

- a. 1000 ml
- b. 3000 ml
- c. 5000 ml
- d. 7500 ml

**7. What is the maximum dose of syntocinon for treatment of obstetric hemorrhage?**

- a. 20 IU
- b. 40 IU
- c. 60 IU
- d. 100 IU

**8. What is the correct dose for misoprostol (rectally) for treatment of obstetric hemorrhage?**

- a. 1 Tablet (200 mcg)
- b. 4 Tablets (800mcg)
- c. 6 Tablets (1200 mcg)
- d. 10 Tablets (2000 mcg)

**9. Indicate whether the following statement is true or false: Ergonovine is contraindicated in patients with hypertension.**

- a. True
- b. False

## Knowledge of Neonatal Resuscitation

**Instructions:** Using an X, mark the option that best answers the question unless the question specifies that you can mark more than one option.

**1. What is the definition of a vigorous infant?**

- a. Crying, good tone, Heart Rate >100
- b. Limp, Heart Rate >160, Respiratory Rate >40
- c. Poor color, Crying, Heart Rate <80
- d. Limp, poor color, crying

**2. What are the first steps in routine newborn care?**

- a. Dry, Stimulate, keep warm
- b. Suction, Give oxygen, Keep open to air
- c. Place under lamp, Check Respiratory Rate, Check Temperature
- d. Position airway, Check Temperature, Obtain APGAR

**3. What is the initial step for resuscitation in a baby born with meconium?**

- a. Dry
- b. Suction
- c. Stimulate
- d. Give oxygen

**4. Indicate whether the following statement is true or false: Bag and mask ventilation is equally effective with or without oxygen.**

- a. True
- b. False

**5. What is the heart rate for beginning positive pressure ventilation?**

- a. <160
- b. <120
- c. <100
- d. <60

**6. What is the rhythm for positive pressure ventilation alone?**

- a. And-One-and-Two-and-Three-and - Four- and -Breathe
- b. Breathe-two-three
- c. One-breathe-two-breathe-three-breathe
- d. One- two- three- breathe- breathe

**7. You have performed the recommendations for resuscitation and the heart rate remains less than 60. For how much time should you continue giving aggressive resuscitation efforts?**

- a. 1 minutes after failure to respond
- b. 5 minute after failure to respond
- c. 15 minutes after failure to respond
- d. 25 minutes after failure to drespond

**8. What is the heart rate for starting chest compressions?**

- a. <100
- b. <90
- c. <80
- d. <60

**9. What is an component of cord care during a normal delivery?**

- a. Immediately clamp and cut the cord, pass the baby to the warmer for evaluation
- b. Place the baby on the abdomen for skin-to-skin and clamp the cord between 1 and 3 minutes following delivery
- c. Leave the cord connected until birth of the placenta
- d. Immediately clamp and cut the cord and place the baby on the maternal abdomen skin-to-skin

**10. How long after a normal birth should breastfeeding be initiated?**

- a. Within 1 hour of delivery of the infant
- b. After the 1-hour evaluation of mother and infant
- c. Before the mother is discharged
- d. Within 1-2 hours, after infant has been evaluated by the provider

## Knowledge of Teamwork and Communication Concepts

**Instructions:** Mark with an X the option that best answers the question.

**1. A 'check back' is used during an emergency situation to ensure:**

- a. All team members are present and accounted for.
- b. The patients family receives adequate communication.
- c. Both sender and receiver confirm the message.
- d. Everyone knows there is an emergency

**2. A 'shared mental model' is important to team functioning because:**

- a. Everyone will have the same clinical knowledge and skill.
- b. It allow for a common understanding of the environment and goals.
- c. It identifies the person responsible for the patient outcome.
- d. It promotes pass off of care to another providers.

**3. Indicate whether the following statement is true or false: A key competency of a leader is to direct, coordinate, and assign tasks.**

- a. True
- b. False

**4. Based on the two-challenge rule: if you express concern about an order twice and the leader does not respond, you should:**

- a. Leave the situation immediately.
- b. Take of vote among those present.
- c. State you are concerned about patient safety and seek a second opinion from a superior or colleague.
- d. Take a leadership role in the situation.

**5. SBAR is a technique for rapidly communicating critical patient information. SBAR stands for: Situation, Background, Assessment, and Recommendation/Request. Please select an example of a correct SBAR:**

- a. "The patient is bleeding!"
- b. "The patient is bleeding excessively. This is her seventh birth. She gave birth about five minutes ago, and I immediately applied 10 units of oxytocin IM but her uterus did not contract. I think she has uterine atony. Please apply 20 additional units of oxytocin IV."
- c. "I have a gravida 9 para 8 patient who arrived about two hours ago with her husband and mother. They traveled for about an hour to get here, and she was almost 8 cm dilated when she arrived. She was doing well and her baby was born very healthy; her placenta was complete. I applied 10 units of oxytocin IM. Please apply an additional 20 units of oxytocin IV, because now she is bleeding excessively."
- d. "The patient gave birth to her seventh child about five minutes ago. Now she is bleeding excessively. I applied 10 units of oxytocin IM but her uterus did not contract. I think she has uterine atony."

**6. Call-out is a quick way of alerting the team to the severity of an emergency so that they can allocate attention appropriately. Please select an example of a correct call-out:**

\_\_\_\_\_ a. "The mother arrived several hours ago and had a very prolonged labor. The baby was born flaccid and is not breathing; there was meconium in the amniotic fluid. Can you please help?"

\_\_\_\_\_ b. "The baby is not breathing. She was born three minutes ago very flaccid and there was meconium in the amniotic fluid. I have suctioned, stimulated and given PPV but her heart rate continues to drop; it is now at 70. I think the breaths I am giving are not effective. Can you please take over and give PPV?"

\_\_\_\_\_ c. "The baby is not breathing!"

\_\_\_\_\_ d. "I think this baby may need help, since it is very flaccid. Can you please evaluate the baby?"

## Knowledge of Preeclampsia/Eclampsia

**Instructions:** Using an X, mark the option that best answer.

**1. If a woman presents at 10 weeks gestation with hypertension without a previous history of hypertension, you would give her a diagnosis of:**

- a. Chronic hypertension
- b. Gestational hypertension
- c. Preeclampsia
- d. Eclampsia

**2. What element helps to differentiate between gestational hypertension and preeclampsia?**

- a. Weeks of gestation
- b. Proteinuria
- c. Edema
- d. History of hypertension prior to pregnancy

**3. What symptom indicates the diagnosis of mild preeclampsia in a pregnancy of 37 weeks gestational age?**

- a. BP >140/90, proteinuria
- b. Proteinuria and edema
- c. BP >140/90 and edema
- d. BP >160/110, proteinuria

**4. What is the preferred treatment/management for severe preeclampsia with BP>160/110?**

- a. Hydralazine and Cesarean
- b. Magnesium sulfate, hydralazine and vaginal delivery
- c. Magnesium sulfate and Cesarean
- d. Hydralazine and vaginal delivery

**5. Indicate whether the following statement is true or false: Magnesium sulfate is administered with the intention of lowering blood pressure to avoid the risk of cerebral hemorrhage.**

- a. True
- b. False

**6. What is the preferred medication to prevent seizures in a patient with preeclampsia?**

- a. Hydralazine
- b. Nifedipine
- c. Magnesium sulfate
- d. Diazepam

**7. What is the loading dose of magnesium sulfate?**

- a. 2 g
- b. 4 g
- c. 1 g
- d. 10 g

**8. A patient is receiving a loading dose of magnesium sulfate, when should you consider using an anti-hypertensive medication as well?**

- a. BP: 140/90
- b. BP: 160/105
- c. Anti-hypertensive medications should not be used if the patient has received magnesium sulfate
- d. Seizures

**9. What is the risk of a 4 g loading dose of magnesium sulfate?**

- a. Cardiac arrest
- b. Respiratory Distress
- c. Fetal distress
- d. None, there is no evidence of cardiac or respiratory effects with a loading dose

**10. What are the signs/symptoms of severe preeclampsia, together with BP 150/95?**

- a. Proteinuria > 3+ and Oliguria
- b. Epigastric pain and severe headache
- c. Platelets < 50,000
- d. All of the above

## Knowledge of Shoulder Dystocia

**Instructions:** Mark with an X the option that best answers the question unless the question specifies that you may mark more than one option.

**1. Indicate whether the following statement is true or false: A shoulder dystocia can be effectively managed by one trained provider.**

- a. True
- b. False

**2. What is a maternal risk factor for shoulder dystocia? (Select all that apply):**

- a. Gestational Diabetes
- b. Pre-eclampsia
- c. Maternal malnutrition
- d. Weight gain of  $\geq 20$  kg during pregnancy

**3. What is a sign of shoulder dystocia? (Select all that apply)**

- a. Prolonged active phase/prolonged 2nd stage
- b. Turtle sign (the chin retracts and presses against the perineum)
- c. The anterior shoulder delivers easily following delivery of the head.
- d. Breech Presentation

**4. What percentage of cases of shoulder dystocia are resolved by the McRoberts with suprapubic maneuver?**

- a. 5-25%
- b. 40-60%
- c. 70-90%
- d. 95-100%

**5. What is the aim of the fetal rotational maneuvers?**

- a. To reduce the diameter of the shoulders
- b. To apply traction to the infant's head
- c. To rotate the axis of the shoulders to a diagonal position with more space.
- d. To extract the posterior arm

**6. What is a potential neonatal complication due to shoulder dystocia?**

- a. Brachial plexus damage
- b. Hip fracture
- c. Macrosomia
- d. Neonatal hypertension

**7. What is a potential maternal complication due to shoulder dystocia?**

- a. Retained placenta
- b. Postpartum hemorrhage
- c. Seizure
- d. Deep vein thrombosis

## Self-Efficacy Assessment for Care of General Obstetric and Neonatal Care and Emergencies

**Instructions:** Please rate how certain you are that you can manage the obstetrical cases

0      10      20      30      40      50      60      70      80      90      100

**Cannot do at all**

**Highly certain can do**

| Obstetric and Neonatal Care and Emergencies |                                                                          | Confidence<br>0-100 |
|---------------------------------------------|--------------------------------------------------------------------------|---------------------|
| <b>1</b>                                    | Asking for help early                                                    |                     |
| <b>2</b>                                    | Communicating with woman and her family during an emergency              |                     |
| <b>3</b>                                    | Locating the equipment needed during an emergency                        |                     |
| <b>4</b>                                    | Communicating your actions to the team in an emergency                   |                     |
| <b>5</b>                                    | Estimate blood loss                                                      |                     |
| <b>6</b>                                    | Preform the three steps of active management of the third stage of labor |                     |
| <b>7</b>                                    | Selecting the right medications and doses for treating uterine atony     |                     |
| <b>8</b>                                    | Determining neonatal vigor                                               |                     |
| <b>9</b>                                    | Recognizing when a newborn needs neonatal resuscitation                  |                     |
| <b>10</b>                                   | Performing routine care of the neonate on the maternal abdomen           |                     |

## Evaluation of PRONTO Training

Please help us evaluate PRONTO by responding to the following questions:

**1. I understood clearly the purpose and objectives of the training.**

|                  |       |         |          |                     |
|------------------|-------|---------|----------|---------------------|
| 1                | 2     | 3       | 4        | 5                   |
| Completely Agree | Agree | Neutral | Disagree | Completely Disagree |

**2. I was supported during the learning process**

|                  |       |         |          |                     |
|------------------|-------|---------|----------|---------------------|
| 1                | 2     | 3       | 4        | 5                   |
| Completely Agree | Agree | Neutral | Disagree | Completely Disagree |

**3. The scenarios were similar to real situations.**

|                  |       |         |          |                     |
|------------------|-------|---------|----------|---------------------|
| 1                | 2     | 3       | 4        | 5                   |
| Completely Agree | Agree | Neutral | Disagree | Completely Disagree |

**4. The feedback was constructive.**

|                  |       |         |          |                     |
|------------------|-------|---------|----------|---------------------|
| 1                | 2     | 3       | 4        | 5                   |
| Completely Agree | Agree | Neutral | Disagree | Completely Disagree |

**5. I would like to participate in simulations in the future.**

|                  |       |         |          |                     |
|------------------|-------|---------|----------|---------------------|
| 1                | 2     | 3       | 4        | 5                   |
| Completely Agree | Agree | Neutral | Disagree | Completely Disagree |

**6. The trainers were well-prepared and had a lot of knowledge about the subject.**

|                  |       |         |          |                     |
|------------------|-------|---------|----------|---------------------|
| 1                | 2     | 3       | 4        | 5                   |
| Completely Agree | Agree | Neutral | Disagree | Completely Disagree |

**7. The trainers were experienced in simulation training**

|                  |       |         |          |                     |
|------------------|-------|---------|----------|---------------------|
| 1                | 2     | 3       | 4        | 5                   |
| Completely Agree | Agree | Neutral | Disagree | Completely Disagree |

**8. I will use the tools I learned in this training in my work.**

|                  |       |         |          |                     |
|------------------|-------|---------|----------|---------------------|
| 1                | 2     | 3       | 4        | 5                   |
| Completely Agree | Agree | Neutral | Disagree | Completely Disagree |

**9. I will use the teamwork concepts in my practice.**

|                  |       |         |          |                     |
|------------------|-------|---------|----------|---------------------|
| 1                | 2     | 3       | 4        | 5                   |
| Completely Agree | Agree | Neutral | Disagree | Completely Disagree |

**10. Have you participated in the Harmonized EMONC training program?**

**Yes**

**No**

**10.1. If yes, when:** \_\_\_\_\_

**11. Have you participated in other obstetric trainings?**

**Yes**

**No**

**11.1 If yes, which:** \_\_\_\_\_

**11.2. How long ago?**

- \_\_\_\_\_ **Less than 3 months**
- \_\_\_\_\_ **Between 3 and 6 months**
- \_\_\_\_\_ **Between 6 and 12 months**

\_\_\_\_\_ More than 1 year ago

12. Have you participated in other neonatal resuscitation trainings? Yes No

12.1 If yes, which: \_\_\_\_\_

12.2 How long ago?

\_\_\_\_\_ Less than 3 months

\_\_\_\_\_ Between 3 and 6 months

\_\_\_\_\_ Between 6 and 12 months

\_\_\_\_\_ More than 1 year ago

13. How important do you believe PRONTO training is for your clinical setting?

| 1              | 2        | 3             |
|----------------|----------|---------------|
| Very important | Somewhat | Not important |

14. Which aspects of the training did you most enjoy?

\_\_\_\_\_  
\_\_\_\_\_  
\_\_\_\_\_

15. Please list two things you would like to see added or changed about the training?

\_\_\_\_\_  
\_\_\_\_\_  
\_\_\_\_\_

16. Is there anything you learned in the Module I PRONTO training that you have (or will) put into practice?

\_\_\_\_\_  
\_\_\_\_\_  
\_\_\_\_\_

17. Have you been impacted by the syntocinon quarentine?

\_\_\_\_\_  
\_\_\_\_\_  
\_\_\_\_\_

18. Additional comments:
